# Supplementary material for: Isolation, Identification, and Biocontrol Potential of Root Fungal Endophytes Associated with Solanaceous Plants against Potato Late Blight (Phytophthora infestans)
Source: MDPI journal article supplement (doi:10.3390/plants11121605), 2022-06-18
Supplement: s1 [file s1]

## Article

# Isolation, Identification, and Biocontrol Potential of Root Fungal Endophytes Associated with Solanaceous Plants Against Potato Late Blight (*Phytophthora infestans*)

Abbas El-Hasan<sup>1,\*</sup>, Grace Ngatia<sup>1</sup>, Tobias I. Link<sup>1</sup> and Ralf T. Voegelé<sup>1</sup><sup>1</sup> Department of Phytopathology, Institute of Phytomedicine, Faculty of Agricultural Sciences, University of Hohenheim, Otto-Sander-Str. 5, D-70599 Stuttgart, Germany;

\* Correspondence: aelhasan@uni-hohenheim.de; Tel.: +49 711 459 22392 (A.E.-H.).

## Supplementary Materials

**Citation:** El-Hasan, A.; Ngatia, G.; Link, T.I.; Voegelé, R.T. Isolation, Identification, and Biocontrol Potential of Root Fungal Endophytes Associated with Solanaceous Plants against Potato Late Blight (*Phytophthora infestans*). *Plants* **2022**, *11*, 1605. <https://doi.org/10.3390/plants11121605>

Academic Editors: Špela Mechora and Dragana Šunjka

Received: 1 June 2022

Accepted: 14 June 2022

Published: 18 June 2022

**Publisher's Note:** MDPI stays neutral with regard to jurisdictional claims in published maps and institutional affiliations.

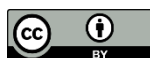

**Copyright:** © 2022 by the authors. Licensee MDPI, Basel, Switzerland. This article is an open access article distributed under the terms and conditions of the Creative Commons Attribution (CC BY) license (<https://creativecommons.org/licenses/by/4.0/>).

**Table S1.** Characteristics of sampling regions.

| Sampling region | Geographic coordinates | Altitude (m asl <sup>a</sup> ) | Rainfall <sup>b</sup> (mm) | Soil properties |                 |                 | Soil types          |
|-----------------|------------------------|--------------------------------|----------------------------|-----------------|-----------------|-----------------|---------------------|
|                 |                        |                                |                            | pH              | EC <sup>c</sup> | OM <sup>d</sup> |                     |
| Kilifi          | 3°38'S 39°51'E         | 8                              | 942                        | 7.4 – 7.6       | 0.02 – 0.52     | 0.7 – 2.0       | Luvisols            |
| Kiambu          | 1°14'S 36°39'E         | 2073                           | 893                        | 6.5 – 6.9       | 0.05 – 0.12     | 1.2 – 3.4       | Nitisols, Andosols  |
| Nyandarua       | 0°42'S 36°39'E         | 2540                           | 1219                       | 5.3 – 7.0       | 0.05 – 0.14     | 5.3 – 7.0       | Cambisols, Glaysols |

<sup>a)</sup> above sea level, <sup>b)</sup> annual average, <sup>c)</sup> EC: electrical conductivity in  $\mu\text{S}/\text{cm}$ , <sup>d)</sup> OM: organic matter.

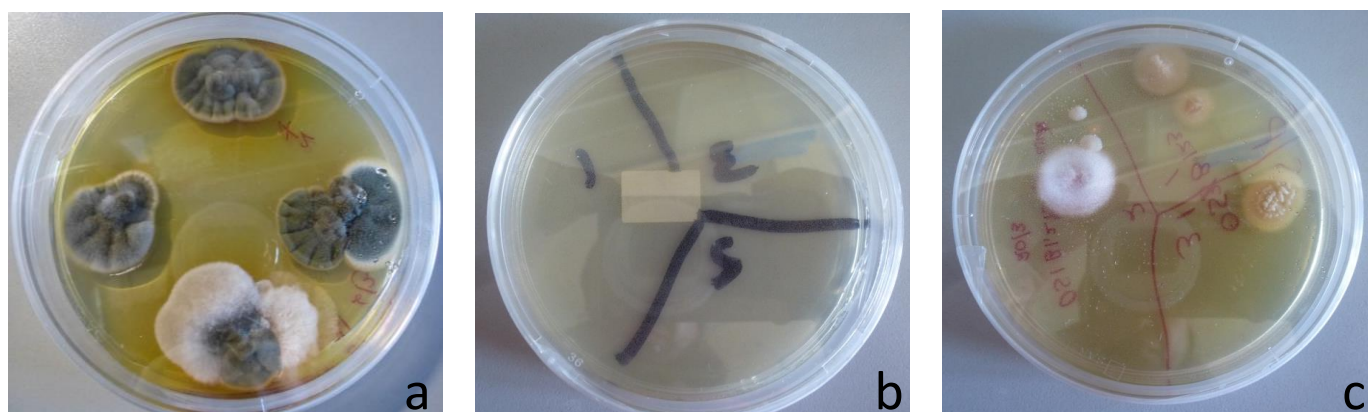

**Figure S1.** Isolation of fungal root endophytes. **a)** Endophytic fungi emerging from cultured roots, **b)** Clean short press plate, and **c)** Contaminated short press plate.

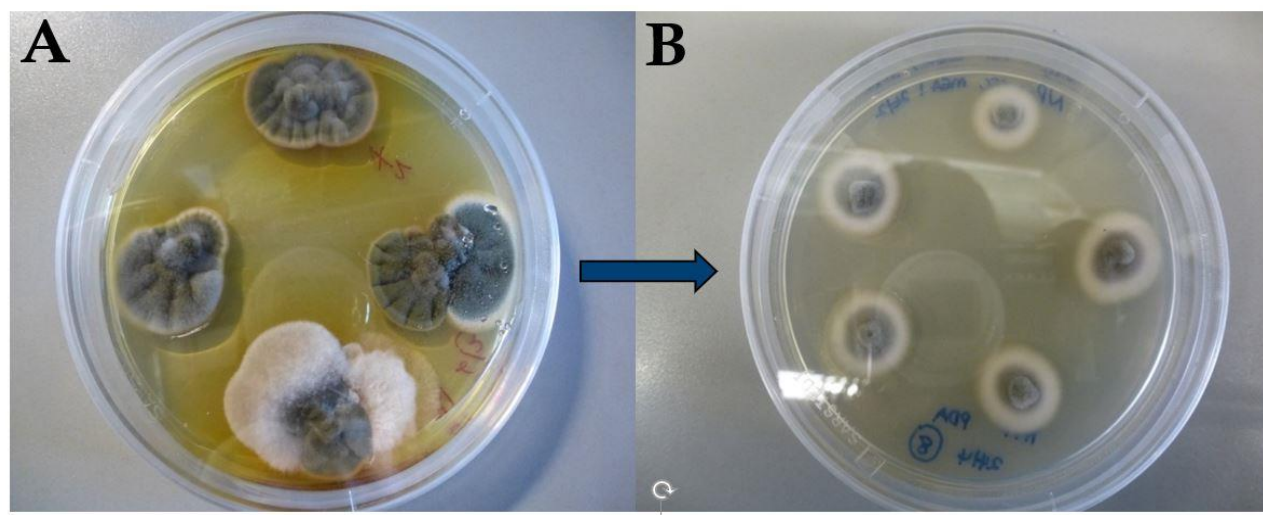

**Figure S2.** Isolation of fungal root endophytes from solanaceous plants. **A)** Endophytic fungi arising from cultured roots, and **B)** Pure fungal colonies.

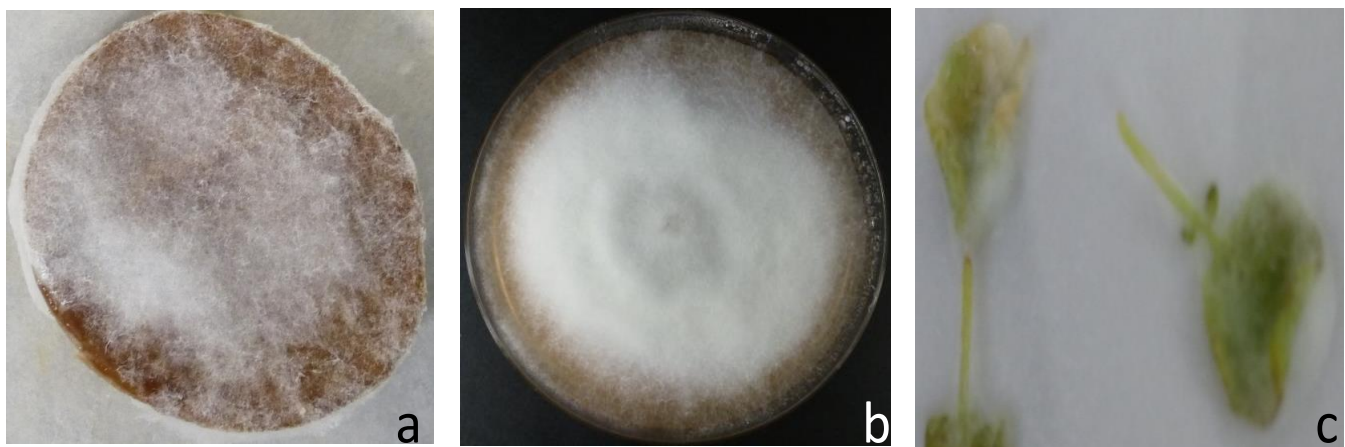

**Figure S3.** Isolation of *P. infestans*. (a) *P. infestans* mycelia growing on the surface of an inoculated potato tuber slice, (b) Pure colony of *P. infestans* on 20 % V8 agar, and (c) Mycelia of *P. infestans* on potato leaflets inoculated with the pathogen.

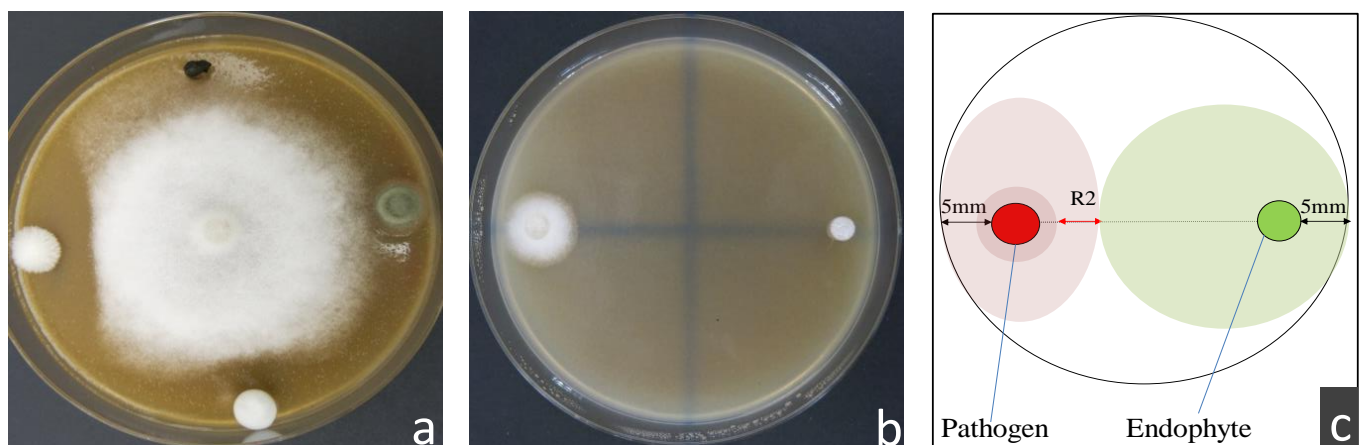

**Figure S4.** Dual antagonistic assay of fungal endophytes and *P. infestans*. (a) Co-culture of *P. infestans* (center colony) with four root endophytes to screen for activity against the pathogen's mycelia, (b) Setup of dual culture assay on the introduction of an endophyte 72 h after *P. infestans* (left colony) inoculation and, (c) Schematic representation of the measurement (R2) used in calculating percentage of inhibition.
